# Supplementary material for: A study of the interaction between inverted cucurbit[6]uril and symmetric viologens
Source: Royal Society of Chemistry journal article supplement (doi:10.1039/c8nj01589a), 2018-01-01
Supplement: c8nj01589a1.pdf [file c8nj01589a1.pdf]

## **Supporting Information**

### **A study of the interaction between inverted cucurbit[6]uril and symmetric viologens**

Dong Bai,<sup>a</sup> Zhongzheng Gao,<sup>a</sup> Zhu Tao,<sup>a</sup> Xin Xiao,<sup>a\*</sup> Timothy J. Prior<sup>b</sup>, Gang Wei <sup>c\*</sup>  
Qingyun Liu<sup>d</sup>, and Carl Redshaw<sup>b\*</sup>

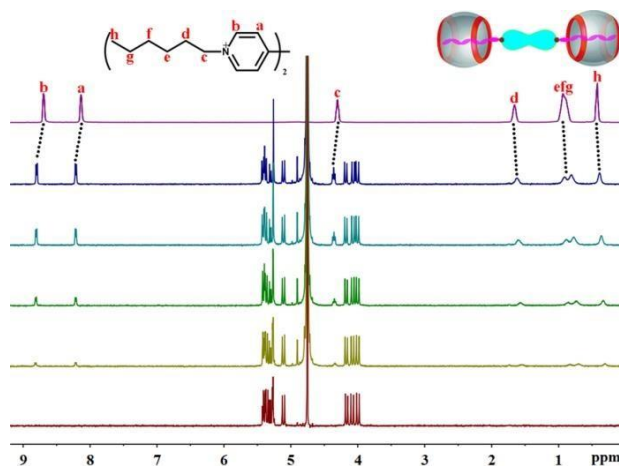

**Figure S1.**  $^1\text{H}$  NMR spectra (400 MHz,  $\text{D}_2\text{O}$ ) of *i*Q[6] (A) in the absence and in the presence of (B) 0.2, (C) 0.4, (D) 0.8, (E) 1.1 equiv of  $\text{HV}^{2+}$  and (F) neat  $\text{HV}^{2+}$  in 1M DCI at 20 °C.

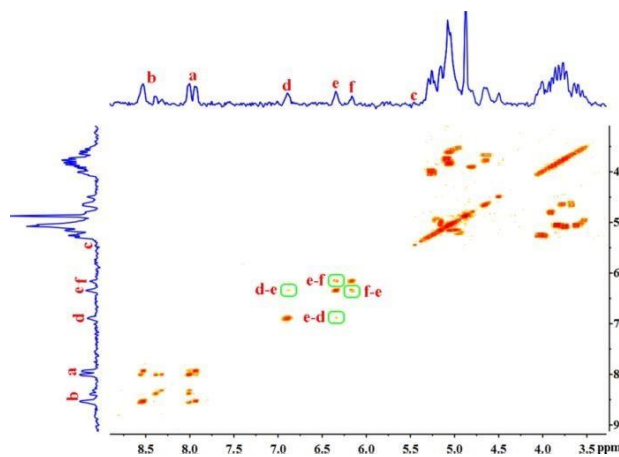

**Figure S2.** COSY NMR of *i*Q[6]- $\text{NV}^{2+}$  system.
